# Supplementary material for: Brain-derived estrogens facilitate male-typical behaviors by potentiating androgen receptor signaling in medaka
Source: eLife. 2026 Jan 13;13:RP97106. doi: 10.7554/eLife.97106 (PMC12799210; doi:10.7554/eLife.97106)
Supplement: Figure 1—source data 1. [file elife-97106-fig1-data1.xlsx]

## Sheet: Sheet1
	Figure 1A, E2				Figure 1A, testosterone				Figure 1A, 11KT
	+/+ male	+/- male	-/- male		+/+ male	+/- male	-/- male		+/+ male	+/- male	-/- male
	0.797486	0.493925	0.129316		1.94826	2.0865	4.84345		6.74383	4.7874	45.6112
	1.33056	0.512776	0.144211		2.01213	2.00099	4.60305		5.59575	6.06261	38.598
	1.46452	0.61146	0.30821		2.13403	1.40825	3.85491		5.71589	5.31015	28.5035
	Figure 1B, E2				Figure 1B, testosterone				Figure 1B, 11KT
	+/+ male	+/- male	-/- male		+/+ male	+/- male	-/- male		+/+ male	+/- male	-/- male
	0.089613	1.42664	0.13989		0.90067	0.754543	1.35632		2.79825	1.78551	10.2524
	0.083323	0.162898	0.108025		0.4086	0.505938	0.739485		1.41108	0.687534	4.49786
	0.093137	0.073358	0.092048		0.411369	0.285698	0.729695		1.12487	0.460315	4.80624
	Figure 1C
	+/+ male	+/- male	-/- male
	1.13773	0.3873	0.00622
	1.14031	0.65589	0.00292
	0.93289	0.35564	0.00397
	0.96171	0.39045	0.00141
	1.04039	0.41202	0.0026
	0.78697	0.3321	0.00157
	Figure 1E, following				Figure 1E, courtship display				Figure 1E, wrapping				Figure 1E, spawning
	+/+ male	+/- male	-/- male		+/+ male	+/- male	-/- male		+/+ male	+/- male	-/- male		+/+ male	+/- male	-/- male
	0.116667	0.3	0.166667		0.6	0.333333	0.7		0.35	0.533333	2.36667		0.866667	1.01667	3.16667
	0.1	0.35	0.1		1.91667	0.766667	1.31667		0.65	0.416667	1.38333		1.31667	0.933333	2.05
	0.05	0.166667	0.216667		1.05	3.86667	0.433333		0.183333	2.03333	2.05		2.4	2.53333	2.83333
	0.166667	0.0666667	0.3		4.51667	0.466667	12.05		1.1	6.91667	1.21667		1.65	7.43333	1.61667
	0.783333	0.1	0.383333		1.23333	6.73333	5.06667		4.56667	0.85	ND		4.96667	1.4	9.71667
	0.0666667	0.15	0.2		2.55	0.266667	7.7		0.183333	0.816667	3.78333		1.01667	1.26667	4.11667
	0.0833333	0.633333	0.3		1.75	ND	2.26667		0.616667	4.1	0.883333		1.26667	4.6	1.46667
	0.666667	0.05	0.1		1		5.76667		0.383333	0.316667	2.46667		0.816667	0.833333	3.21667
	0.416667	0.0666667	0.05		0.716667		3		2.58333	0.8	9.58333		3.16667	1.23333	9.9
	0.0666667	0.0833333	4.33333		13.5333		ND		0.116667	0.55	1.8		0.85	1.08333	2.23333
	0.1	5.41667	5.05		ND		ND		1.78333	10.25	ND		2.31667	10.5167	ND
	0.1	2.53333	0.2				ND		0.633333	ND	4.78333		1.01667	ND	5.31667
	0.1	0.0333333	0.0666667						0.2	0.316667	6.68333		0.533333	0.766667	7.35
	0.716667	0.0666667	0.8						1.08333	0.533333	9.33333		1.51667	0.933333	ND
	0.116667	1.38333	0.2						0.966667	ND	ND		1.43333	ND	ND
	0.283333	0.0833333	2.1						13.5833	0.25	ND		14.0333	0.816667	ND
	8.86667	0.0333333	0.15						ND	0.35	ND		ND	0.783333	ND
	0.133333	0.45	ND						ND	ND	ND		ND	ND	ND
	Figure 1G, following				Figure 1G, courtship display				Figure 1G, wrapping				Figure 1H, courtship display				Figure 1H, wrapping attempt
	+/+ male	+/- male	-/- male		+/+ male	+/- male	-/- male		+/+ male	+/- male	-/- male		+/+ male	+/- male	-/- male		+/+ male	+/- male	-/- male
	0.683333	0.383333	0.483333		1.63333	2.1	12.5		1.71667	5.3	ND		23	33	4		10	15	0
	0.166667	0.3	1.85		0.583333	4.63333	ND		0.466667	12.2667	12.1		19	17	1		13	1	6
	2.11667	0.333333	2.18333		2.4	0.583333	ND		3.11667	0.766667	ND		33	41	4		22	17	4
	0.0666667	0.366667	ND		3.08333	0.416667	ND		0.466667	8.75	ND		36	26	1		24	6	0
	0.0833333	0.35	0.3		0.15	0.416667	1.43333		1.36667	1.15	ND		29	44	11		4	24	0
	0.3	0.35	3.28333		0.683333	5.13333	ND		1.28333	ND	3.5		36	25	0		10	6	1
	0.166667	1.31667	1.11667		0.266667	5.88333	1.6		1.13333	ND	1.65		24	14	22		14	6	4
	0.633333	0.433333	0.266667		10.2667	3.48333	0.583333		11.75	0.766667	1.06667		27	17	31		19	15	15
	0.333333	0.2	2.6		1.26667	0.683333	ND		0.533333	0.733333	ND		38	45	0		18	19	0
	0.733333	0.25	0.683333		2.95	0.383333	2.18333		2.86667	1.6	0.816667		28	38	8		8	13	11
	0.966667	0.216667	3.46667		1.03333	1.28333	ND		13.05	0.45	3.51667		17	34	0		15	23	1
	0.25	0.1	0.15		0.433333	1.85	5.83333		0.483333	2.28333	1.06667		43	31	17		28	32	8
	2.01667	0.283333	2.45		2.35	3.6	ND		2.11667	3.63333	ND		23	20	1		15	15	0
	0.15	0.1	3.06667		1.4	1.23333	ND		0.25	0.383333	ND		16	42	3		12	39	0
	0.45	0.483333	0.2		5.03333	2.35	4.96667		1.8	2.3	ND		18	26	4		21	14	0
	0.283333	0.816667	1.31667		0.55	1.93333	11.3833		0.683333	2.08333	ND		45	44	0		30	42	1
			ND				ND				ND				0				0
	Figure 1I
	+/+ male	-/- male	+/+ female
	106.4	65.2333	10.9833
	ND	38.1	ND
	ND	45.4333	13.5
	ND	78.8667	35.9
	ND	ND	63.25
	ND	3.25	ND
	ND	ND	ND
	ND	ND	9.95
	ND	38.75	3.93333
	ND	ND	8.41667
	ND	ND	14.6167
	ND	88.5833	8.3
	ND	ND	4.78333
	ND	47.7167	4.68333
	75.5333	ND	118.683
	Figure 1K, chase				Figure 1K, fin display				Figure 1K, circle				Figure 1K, strike				Figure 1K, bite
	+/+ male	+/- male	-/- male		+/+ male	+/- male	-/- male		+/+ male	+/- male	-/- male		+/+ male	+/- male	-/- male		+/+ male	+/- male	-/- male
	20	19	9		3	9	0		12	6	1		6	3	0		15	19	5
	17	30	2		7	9	1		5	14	1		2	9	0		17	21	1
	10	19	11		17	11	4		15	13	1		17	4	0		18	20	8
	7	13	0		23	7	0		42	3	0		43	3	0		18	11	2
	7	17	1		3	6	0		6	9	0		7	2	0		7	20	2
	17	6	5		8	3	3		8	5	9		6	2	9		17	9	7
		10				11				9				3				24
