# Supplementary material for: Brain-derived estrogens facilitate male-typical behaviors by potentiating androgen receptor signaling in medaka
Source: eLife. 2026 Jan 13;13:RP97106. doi: 10.7554/eLife.97106 (PMC12799210; doi:10.7554/eLife.97106)
Supplement: Figure 2—figure supplement 1—source data 1. [file elife-97106-fig2-figsupp1-data1.xlsx]

## Sheet: Sheet1
	Figure 2S1A, chase
		+/+ male						-/- male
	day0	14	31	12	8	9	27	0	0	4	1	0
	day4	1	6	18	4	1		1	0	0	0
	Figure 2S1A, fin display
		+/+ male						-/- male
	day0	3	6	1	1	6	3	0	0	0	0	0
	day4	0	3	1	4	2		0	0	0	0
	Figure 2S1A, circle
		+/+ male						-/- male
	day0	4	3	1	3	5	8	0	0	1	0	0
	day4	1	3	5	5	2		0	0	0	0
	Figure 2S1A, strike
		+/+ male						-/- male
	day0	5	6	7	4	3	3	0	0	1	0	0
	day4	1	5	1	9	0		0	0	0	1
	Figure 2S1A, bite
		+/+ male						-/- male
	day0	11	22	17	12	17	26	0	3	7	2	0
	day4	2	6	20	6	2		2	3	1	2
	Figure 2S1B, Vs/Vp
		vehicle					E2
	+/+ male	4.20325		1.9352	3.83889	7.32678		8.52463	9.72765	12.7527	5.76893
	-/- male	3.00132	1.28625	2.73528	4.06884	3.05315	6.64062	7.1756	11.1081	6.66937	5.09207
	Figure 2S1B, PMp
		vehicle					E2
	+/+ male	38.403	28.221	23.4537	27.1139	26.8446	41.8153	48.7545	58.5466	48.2045
	-/- male	22.0918	21.7032	23.4436	28.0088	24.8154	50.1854	36.3722	60.0359	50.7005	39.7181
	Figure 2S1B, PMm/PMg/aPPp
		vehicle					E2
	+/+ male	1.49563	1.50929	0.094143	1.69038	2.91186	1.83037	3.84221	2.97473	3.98678	4.15509
	-/- male	2.49048	1.11114	2.95566	0.357525	0.814102	2.42985	2.19404	2.73336	4.86426	2.48136
	Figure 2S1B, VM
		vehicle					E2
	+/+ male	0.09558		2.23224	0.046113	0.154031	0.299912	1.53549	0.793031	2.52495
	-/- male	0.084202		0.284104	0.090429	0.017487	0.293086	0.307702		0.520418	0.044316
	Figure 2S1B, NAT
		vehicle					E2
	+/+ male	6.95603	8.78264	5.86752	7.69827	5.20412	7.56823	12.1424	9.88132	10.525	7.44877
	-/- male	6.07607	2.39092	4.74975	3.29091	1.4186	7.88878	7.5578	10.663	12.4373	8.21961
	Figure 2S1B, NPT
		vehicle					E2
	+/+ male	2.74662	2.9206	1.68691	1.04012	1.47695	3.03733	10.4405	7.21621	11.5192
	-/- male	1.64223	0.68187	0.997117	0.070786	0.411902	4.3321	2.72799	6.21853	9.28751	2.43033
	Figure 2S1C, Vv
		vehicle					E2
	+/+ male	1.06755	1.36675	0.309019	0.449153	0.381002	1.01652	0.756858	0.694689	0.254881	0.896507
	-/- male		0.693499	0.113306		0.571805	0.359084		0.970415	1.49454
	Figure 2S1C, Vs/Vp
		vehicle					E2
	+/+ male	3.7718	7.78728	3.09223	1.7263	2.09737	5.76912	4.97988	5.27281	3.62511	3.81671
	-/- male	1.02599	3.13835	2.29797	1.83447	2.44628	4.67563	2.41452	5.18254	5.25677	3.52469
	Figure 2S1C, PPa
		vehicle					E2
	+/+ male	2.0479	5.63433	2.23835	2.85685	4.47178	4.07146	4.40532	3.74497	3.06109	3.68748
	-/- male	2.62414	2.71351	2.33426	2.58976	2.76033	5.36853	3.14095	3.98814	3.84092	5.53497
	Figure 2S1C, pPPp
		vehicle					E2
	+/+ male	0.313928	0.981076	0.419212	0.346147	0.436697	0.523649	1.1405	0.314886	0.345191	0.138818
	-/- male	0.342195	0.760214	0.217389	0.246496	0.256438	0.866089	0.782364	0.542939	1.11462	0.434299
	Figure 2S1C, NVT
		vehicle					E2
	+/+ male	11.2192	10.9722	4.63074	4.22575		10.9194	11.5346	8.07804	5.44509	3.624
	-/- male	3.23091	4.4772	3.13087	3.17666	3.42616	9.78773	8.07445	10.7718	13.1251	7.12724
