# Supplementary material for: Brain-derived estrogens facilitate male-typical behaviors by potentiating androgen receptor signaling in medaka
Source: eLife. 2026 Jan 13;13:RP97106. doi: 10.7554/eLife.97106 (PMC12799210; doi:10.7554/eLife.97106)
Supplement: Figure 2—source data 1. [file elife-97106-fig2-data1.xlsx]

## Sheet: Sheet1
	Figure 2B			Figure 2C			Figure 2D			Figure 2E
	day 0	day 4		day 0	day 4		day 0	day 4		day 0	day 4
	8.43333	2.41667		7	16		12.0833	10.2		1	5
	11.1167	5.46667		6	14		11.0667	3.18333		0	9
	9.71667	11.6167		4	19		ND	ND		0	2
	11.55	5.03333		2	3		ND	6.55		0	9
	1.5	3.75		33	16		ND	6.2		0	14
	ND	6.38333		1	8		ND	6.76667		0	3
	6.9	10.35		15	11		ND	4.85		2	11
	8.66667	3.46667		5	7		ND	13.75		0	1
	4.05	3.28333		1	0		ND	3.83333		0	8
	0.983333	ND		12	9		ND	9.85		1	4
	15	10.8833		7	1		ND	ND		0	14
	2.58333	ND		13	6		ND			1
	Figure 2F, left
		+/+ male						-/- male
	Vs/Vp	0.1357	0.2459	0.18685	0.59863	0.70032	0.37094	0.30052	0.28602	0.64594	0.53754	0.32327	0.24242	0.25763
	PMm/PMg/aPPp	0.2011	0.08564	0.15283	0.16217	0.24278	0.13067	0.15247	0.3325	0.56497	0.2429	0.26794	0.04803	0.09822
	pPPp	0.02899	0.07079		0.05102	0.08384	0.05833	0.06276	0.00168	0.00323	0.02467	0.01497	0.04348	0.02419
	VM	0.00156	0.00539	0.02084	0.02515	0.00108	0.01425	0.02276	0.0406	0.21763	0.04216	0.03174	0.00479	0.00515
	NAT	0.57108	0.57384	0.533	0.43083	0.22805	0.24446	0.18996	0.15092	0.35537	0.5391	0.14625	0.22266	0.13487
	NPT	0.26326	0.20505	0.15714	0.17403	0.20745	0.12756	0.38687	0.20649	0.18457	0.27248	0.19056	0.15535	0.13439
	Figure 2F, right
		+/+ male						-/- male
	PMp	13.393	13.0955	11.6726	13.8407	11.9818	10.3776	8.24593	11.7386	12.341	11.5179	10.7305	12.3742	10.8183
	PPa	2.49214	1.8274	1.45861	1.11594	1.20289	0.76488	0.33657	1.03821	0.74415	0.54545	0.69326	0.70427	0.22817
	NVT	8.45043	7.52078	4.83973	5.59814	5.40792	5.33919	2.24471	2.67841	3.6555	4.37903	2.06827	2.47155	3.29164
	Figure 2H, left
		+/+ male						-/- male
	Vv	0.31561	0.37885	0.20984	0.34076	0.2247	0.04	0.19212	0.16804	0.00491	0.0303	0.55959	0.79111	0.19188
	Vs/Vp	1.11235	1.91172	1.90524	2.97291	0.8026	1.58653	0.77458	1.73912	0.07031	1.66773	0.91052	2.01412	0.50737
	PPa	2.41539	1.68211	1.56724	3.90272	2.1449	1.98789	0.92107	3.33524	0.67948	2.79923	1.50772	1.28374	0.61504
	aPPp	0.18302	0.19451	0.47418	0.67385	0.40879	0.61851	0.17379	0.25308	0.11762	0.25787	0.32866	0.15307	0.1296
	pPPp	0.80765	0.83447	0.15127	0.55527	0.19643	0.22302	0.23799	0.31093	0.02336	0.02851	0.15104	0.24781	0.15223
	NVT	1.98851	2.95807	1.6621	3.46159	3.38133	1.66486	0	1.59456	0.46185	0.43035	2.06719	2.79397	1.51072
	Figure 2H, right
		+/+ male						-/- male
	PMp	8.98543	11.3422	10.2553	19.4573	15.3707	13.8307	3.79062	6.12406	1.16744	5.28178	7.6979	4.87373	3.90537
	NPT	10.9906	12.0656	8.87932	15.8157	11.4524	12.2091	4.22097	6.46698	4.7385	5.97359	8.16945	10.0843	9.04478
	Figure 2J, PPa
		vehicle					E2
	+/+ male	15.2831		4.51658		8.27504		18.7826	30.5364	23.0066
	-/- male		4.28561	3.63657	4.21951		8.71606	6.77423	20.5786	21.4743	12.0693
	Figure 2J, pPPp
		vehicle					E2
	+/+ male	1.39765	2.04337	2.14325	1.2023	4.60344	3.04942	11.1351	9.84407	10.0772	1.8347
	-/- male	2.34567	1.62485	1.03557	1.20744	1.69863	5.84915	3.39035	6.68673	4.86725	4.22826
	Figure 2J, NVT
		vehicle					E2
	+/+ male	32.8904	27.7766	39.7771	26.9706	22.925	50.2063		33.2918	57.9427	24.5008
	-/- male	22.2553	16.5241	21.3027	21.4644	13.7768	38.3197	27.826	43.9175	35.2009	34.6927
	Figure 2K, PMp
		vehicle					E2
	+/+ male	12.6893	24.891	13.3237	12.6622	15.9844	23.0931	22.2265	28.225	17.0296	17.3781
	-/- male	5.38182	7.72862	8.44198	8.17617	14.6111	21.1928	20.9591	28.8415	19.6334	24.7501
	Figure 2K, aPPp
		vehicle					E2
	+/+ male	1.26937	1.5312	1.13559	0.713494	0.744517	1.1927	1.18445	1.58365	1.32938	1.59383
	-/- male	0.455741	1.27872	0.62342	0.840338	1.48724	2.38267	1.84476	1.83291	2.92405	1.34577
	Figure 2K, NPT
		vehicle					E2
	+/+ male	24.3592	21.0155	13.4366	14.1286		26.5122	25.1095	18.4448	20.9307	18.3946
	-/- male	10.9017	12.969	10.3986	12.9148	10.3224	24.1838	22.3546	25.7776	18.1686	25.0508
