# Supplementary material for: Brain-derived estrogens facilitate male-typical behaviors by potentiating androgen receptor signaling in medaka
Source: eLife. 2026 Jan 13;13:RP97106. doi: 10.7554/eLife.97106 (PMC12799210; doi:10.7554/eLife.97106)
Supplement: Figure 3—source data 1. [file elife-97106-fig3-data1.xlsx]

## Sheet: Sheet1
	Figure 3A, PMp/PPa/PMm/PMg			Figure 3A, SC/aNVT			Figure 3A, pNVT
	+/+ male	-/- male		+/+ male	-/- male		+/+ male	-/- male
	42.9293	43.5564		0.02851	0.04468		1.43608	0.49264
	50.6666	37.1672		0.04599	0.17954		3.05218	0.30734
	43.2703	31.3053		0.07678	0.13319		1.92228	0.13056
	51.4449	44.4602		0.09773	0.39502		3.05036	0.76225
	Figure 3C, aPMp/PPa			Figure 3C, pPMp			Figure 3C, PPp			Figure 3C, NAT/NVT/NRL
	+/+ male	-/- male		+/+ male	-/- male		+/+ male	-/- male		+/+ male	-/- male
	1.06575	1.17032		20.4327	9.48447		1.45753	2.04815		0.125883	0.00790513
	0.976639	2.97409		23.6969	7.24065		1.79554	1.29319		0.146843	0.0356924
	3.10206	3.70213		22.0954	6.81592		1.43934	1.63038		0.00107798	0.0794109
		3.09159			14.0628			1.87062			0.0355727
