# Supplementary material for: Brain-derived estrogens facilitate male-typical behaviors by potentiating androgen receptor signaling in medaka
Source: eLife. 2026 Jan 13;13:RP97106. doi: 10.7554/eLife.97106 (PMC12799210; doi:10.7554/eLife.97106)
Supplement: Figure 4—figure supplement 1—source data 1. [file elife-97106-fig4-figsupp1-data1.xlsx]

## Sheet: Sheet1
	Figure 4S1A, via Esr1								Figure 4S1A, via Esr2a								Figure 4S1A, via Esr2b
		without E2			with E2					without E2			with E2					without E2			with E2
	wild-type	1.13	0.734	1.136	3.325	2.098	4.095		wild-type	0.806	0.852	1.341	3.165	3.685	5.772		wild-type	0.884	1.076	1.041	12.006	14.531	19.071
	mut+2050-5'	0.747	0.545	0.875	0.243	0.251	0.331		mut+2050-5'	0.61	0.529	0.699	0.4	0.405	0.446		mut+2050-5'	0.751	0.777	0.963	0.767	0.8	0.756
	mut+2050-3'	0.423	0.34	0.458	0.114	0.107	0.162		mut+2050-3'	0.296	0.333	0.438	0.142	0.14	0.177		mut+2050-3'	0.513	0.499	0.567	0.218	0.251	0.315
	Figure 4S1B, via Esr1								Figure 4S1B, via Esr2a								Figure 4S1B, via Esr2b
		without E2			with E2					without E2			with E2					without E2			with E2
	wild-type	0.622	1.225	1.153	4.803	7.08	7.417		wild-type	0.904	0.969	1.127	4.721	4.419	5.776		wild-type	0.931	0.966	1.103	6.843	6.372	8.447
	mut-3327-5'	1.055	1.102	1.327	1.707	1.918	2.119		mut-3327-5'	0.63	0.528	0.839	0.735	0.427	0.789		mut-3327-5'	0.953	0.708	0.98	0.775	0.672	0.804
	mut-3327-3'	0.788	0.922	1.29	2.726	3.176	3.902		mut-3327-3'	0.455	0.383	0.564	0.832	0.548	1.024		mut-3327-3'	0.545	0.527	0.757	0.729	0.685	0.994
