# Supplementary material for: Brain-derived estrogens facilitate male-typical behaviors by potentiating androgen receptor signaling in medaka
Source: eLife. 2026 Jan 13;13:RP97106. doi: 10.7554/eLife.97106 (PMC12799210; doi:10.7554/eLife.97106)
Supplement: Figure 4—source data 1. [file elife-97106-fig4-data1.xlsx]

## Sheet: Sheet1
	Figue 4C, via Esr1					Figue 4C, via Esr2a					Figue 4C, via Esr2b
	0	-11	-9	-7		0	-11	-9	-7		0	-11	-9	-7
	0.887	0.818	2.257	2.811		0.838	0.868	3.448	3.516		0.918	1.373	9.005	10.476
	1.005	0.898	2.345	2.923		0.92	0.99	3.575	3.604		0.889	1.324	9.28	11.588
	1.107	1.036	2.576	3.482		1.242	1.274	4.332	4.213		1.193	2.429	12.134	13.665
	Figue 4D, via Esr1								Figue 4D, via Esr2a								Figue 4D, via Esr2b
		without E2			with E2					without E2			with E2					without E2			with E2
	wild-type	0.989	1.241	0.77	3.318	3.262	2.071		wild-type	1.154	0.945	0.901	4.201	2.891	3.545		wild-type	1.074	1.27	0.656	11.328	11.829	6.668
	mut+1699	1.009	0.788	0.625	3.133	2.889	2.287		mut+1699	1.05	0.805	1.196	4.573	2.51	3.931		mut+1699	0.904	0.899	0.493	12.052	8.733	4.74
	mut+2050	0.404	0.353	0.238	0.117	0.152	0.1		mut+2050	0.494	0.545	0.325	0.18	0.158	0.13		mut+2050	0.502	0.41	0.263	0.202	0.194	0.081
	Figue 4E, via Esr1					Figue 4E, via Esr2a					Figue 4E, via Esr2b
	0	-11	-9	-7		0	-11	-9	-7		0	-11	-9	-7
	0.898	1.027	3.516	8.084		0.958	1.396	6.136	7.49		0.979	1.176	5.739	9.535
	1.163	1.429	4.441	10.067		1.185	1.701	6.253	7.992		1.06	1.734	7.133	9.002
	0.938	1.125	3.935	8.585		0.857	1.459	5.349	5.81		0.962	1.265	6.246	7.748
	Figue 4F, via Esr1								Figue 4F, via Esr2a								Figue 4F, via Esr2b
		without E2			with E2					without E2			with E2					without E2			with E2
	wild-type	0.962	1.063	0.975	6.01	7.531	5.139		wild-type	0.988	0.881	1.131	5.995	5.373	6.238		wild-type	0.85	0.656	1.494	6.336	5.779	6.711
	mut-1272	0.243	0.306	0.303	1.013	0.838	0.902		mut-1272	0.179	0.202	0.185	1.309	1.502	1.561		mut-1272	0.343	0.352	0.303	1.309	1.265	1.114
	mut-2180	1.026	1.073	0.901	9.359	7.266	8.176		mut-2180	0.419	0.315	0.472	4.164	3.612	4.696		mut-2180	0.417	0.389	0.42	3.396	3.374	3.81
	mut-3327	1.006	1.105	0.973	1.874	1.777	1.608		mut-3327	0.344	0.388	0.541	0.485	0.612	0.434		mut-3327	0.376	0.388	0.407	0.46	0.455	0.596
