# Supplementary material for: Brain-derived estrogens facilitate male-typical behaviors by potentiating androgen receptor signaling in medaka
Source: eLife. 2026 Jan 13;13:RP97106. doi: 10.7554/eLife.97106 (PMC12799210; doi:10.7554/eLife.97106)
Supplement: Figure 5—figure supplement 2—source data 1. [file elife-97106-fig5-figsupp2-data1.xlsx]

## Sheet: Sheet1
	Figure 5S2A, left
		+/+ male					-/- male
	Vs/Vp	0.039047	0.157504	0.068631	0.037849	0.26039	0.051623	0.354295	0.122768	0.084201	0.234999
	PMm/PMg/aPPp	0.017727	0.110792	0.161816	0.094862	0.097856	0.214395	0.149719	0.161216	0.041322	0.194156
	pPPp	0.043239	0.044796	0.09067	0.029465	0.020002	0.034734	0.022638	0.055336	0.005869	0.060007
	VM	0.003473	0.000838	0.004551	0.002036	0.001318	0.002156	0.006468	0.002515	0	0.001437
	NAT	0.090071	0.114265	0.193556	0.407356	0.873277	0.049946	0.228531	0.181697	0.339919	0.293689
	NPT	0.286022	0.142412	0.261588	0.119057	0.107198	0.016169	0.131873	0.070786	0.116181	0.252726
	Figure 5S2A, right
		+/+ male					-/- male
	PMp	9.24265	16.344	12.6282	13.6059	10.6989	13.0404	15.1931	12.2537	8.15591	11.7556
	PPa	0.212121	0.575159	0.545095	0.790518	0.66966	0.276079	0.937241	0.65708	0.414419	0.899512
	NVT	3.94286	3.80369	4.36328	5.29192	5.3883	3.66208	6.11752	3.34145	3.29223	6.63638
	Figure 5S2C, left
		+/+ male					-/- male
	Vv	0.013415	0.022158	0.001557	0.01078		0.060246	0.016888	0.036172	0.028267	0.101569
	Vs/Vp	0.446401	0.17463	0.284822	0.352736		0.419449	0.204576	0.495026	0.958919	0.46892
	PPa	1.05737	1.93399	1.01065	1.52832		0.39262	0.840822	1.23355	1.49635	0.605942
	aPPp	0.339801	0.311172	0.146963	0.46197		0.427594	0.36232	0.641389	0.644988	0.449516
	pPPp	0.052701	0.017487	0.02144	0.027069		0.067792	0.104444	0.206011	0.189005	0.014852
	NVT	0.428315	1.61109	0.95915	0.238591		0.862854	0.760333	0.358364	0.603067	0.341958
	Figure 5S2C, right
		+/+ male					-/- male
	PMp	9.7468	7.37698	8.43269	14.4938		4.55094	2.74764	11.5508	10.3512	9.31527
	NPT	11.1186	6.77069	8.31774	10.42	6.5773	9.45665	5.75688	6.28094	8.45923	4.64799
	Figure 5S2E, left
		+/+ male					-/- male
	Vs/Vp	0.572168	0.571921	0.378009	0.307583	0.677086	0.290571	0.525214	0.656365	0.179542	0.224815
	PMm/PMg/aPPp	0.329862	0.051623	0.209725	0.093784	0.038567	0.069589	0.124327	0.115582	0.038567	0.04216
	pPPp	0.1387	0.056054	0.141693	0.039406	0.063001	0.025991	0.154869	0.03701	0.051024	0.036052
	VM	0.003114	0.002156	0.007306	0.000479	0	0.002875	0.001078	0.000479	0	0.00012
	NAT	0.623911	0.168283	0.365073	0.38879	0.247215	0.067313	0.150677	0.13271	0.241466	0.165887
	NPT	0.153433	0.107078	0.298598	0.10636	0.161696	0.101568	0.073422	0.08492	0.049227	0.06336
	Figure 5S2E, right
		+/+ male					-/- male
	PMp	17.422	9.58001	8.91075	5.4536	10.7738	10.8536	11.5233	10.3482	9.10874	9.50153
	PPa	0.674456	0.407711	0.538028	0.279915	0.809317	0.655163	0.595522	0.825127	0.524613	0.180739
	NVT	6.5546	4.16227	4.51263	4.09751	3.71301	5.13626	4.54331	3.04108	3.29452	1.74019
	Figure 5S2G, left
		+/+ male					-/- male
	Vv	0.397532	0.69925		0.509885	0.347344	0.102886	1.40376	0.204814	0.361241	0.381599
	Vs/Vp	1.70331	1.75926	2.59815	2.11188	1.5222	2.04933	2.42341	2.3762	4.72799	3.15041
	PPa	2.66415	1.63194	2.12612	1.4833	1.22181	3.18599	2.2368	3.62521	3.32531	2.5616
	aPPp	1.19284	1.88551	1.89807	1.45575	0.794339	1.63707	1.33489	1.46089	2.11007	1.69504
	pPPp	0.182536	0.120015	0.29213	0.169482	0.113665	0.279433	0.283148	0.179062	0.080608	0.304584
	NVT	2.08755	2.73711	3.30913	4.28485	4.50325	3.35523	1.69458	4.20791	2.91747	3.31797
	Figure 5S2G, right
		+/+ male					-/- male
	PMp	20.165	15.3356	36.14	16.4496	11.6056	24.3732	32.2942	19.4961	26.652	19.9344
	NPT	3.87016	10.6021	9.86834	12.251	14.3702	9.08234	3.96754	12.5254	11.9835	7.86625
