# Supplementary material for: Brain-derived estrogens facilitate male-typical behaviors by potentiating androgen receptor signaling in medaka
Source: eLife. 2026 Jan 13;13:RP97106. doi: 10.7554/eLife.97106 (PMC12799210; doi:10.7554/eLife.97106)
Supplement: Figure 5—figure supplement 3—source data 1. [file elife-97106-fig5-figsupp3-data1.xlsx]

## Sheet: Sheet1
	Figure 5S3, following			Figure 5S3, courtship display			Figure 5S3, wrapping			Figure 5S3, spawning
	+/+ male	-/- male		+/+ male	-/- male		+/+ male	-/- male		+/+ male	-/- male
	0.35	4.06667		2.11667	5.28333		2.86667	ND		3.35	ND
	0.616667	0.633333		4.2	2.38333		4.3	2.48333		4.3	2.48333
	0.866667	4.78333		3.56667	2.16667		4.78333	4.95		6.03333	4.95
	0.433333	2.23333		2.1	2.21667		4.41667	4.2		4.41667	4.2
	0.333333	0.4		0.75	1.16667		1.03333	5.2		1.26667	5.2
	0.783333	0.4		1.7	1.41667		3.01667	2.25		3.01667	2.25
	0.266667	0.733333		1.48333	1.91667		2.45	2.25		2.45	2.25
	0.666667	0.783333		1.65	5.18333		3.01667	1.66667		3.01667	1.66667
	0.516667	0.416667		3.5	1.51667		4.7	2.03333		5.05	2.03333
	0.966667	4.5		1.43333	0.916667		1.5	6.9		1.5	1.68333
	1.05	0.866667		0.8	0.8		1.35	1.68333		1.5	3.05
	0.8	0.4		3.91667	2.41667		3.16667	3.05		4.35	2.9
	0.466667	1.73333		3.26667	1.13333		ND	2.83333		ND	5.11667
	0.483333	3.5		7.56667	2.38333		8.7	5.11667		8.7	0.9
	0.35	0.516667		0.633333	0.716667		0.7	0.9		0.7	2.46667
	0.566667	1.8		0.65	1.03333		0.85	2.46667		0.85	5.35
	0.216667	4.93333		0.9	1.3		1.48333	5.35		1.48333	1.46667
	0.366667	0.466667		0.633333	1.75		2.53333	1.46667		2.53333	10.9833
	0.316667	1.93333		4.5	1.56667		7.21667	10.9833		12.2	0.8
	0.3	0.533333		0.45			1.16667	0.8		1.16667	2.3
	1.4	0.433333		1.13333			3.55	2.3		3.55	5.43333
	0.25	0.166667					0.583333	1.36667		0.583333	1.86667
	0.2	0.583333					3.36667	1.86667		3.36667	1.65
		1.38333						1.65			ND
