# Supplementary material for: Brain-derived estrogens facilitate male-typical behaviors by potentiating androgen receptor signaling in medaka
Source: eLife. 2026 Jan 13;13:RP97106. doi: 10.7554/eLife.97106 (PMC12799210; doi:10.7554/eLife.97106)
Supplement: Figure 5—figure supplement 4—source data 1. [file elife-97106-fig5-figsupp4-data1.xlsx]

## Sheet: Sheet1
	Figure 5S4A, following			Figure 5S4A, courtship display			Figure 5S4A, wrapping			Figure 5S4A, spawning
	+/+ male	-/- male		+/+ male	-/- male		+/+ male	-/- male		+/+ male	-/- male
	0.433333	0.183333		1.1	0.233333		1.23333	0.5		1.23333	0.5
	1.11667	0.216667		1.76667	0.566667		1.8	1.26667		1.8	1.26667
	0.25	0.783333		0.466667	1.08333		0.6	1.21667		7.5	1.21667
	0.466667	0.216667		0.533333	0.433333		0.666667	1.23333		0.666667	1.23333
	0.483333	0.316667		0.566667	1.33333		0.783333	0.366667		1.21667	0.366667
	0.333333	0.216667		0.533333	1.6		0.6	2.53333		0.6	2.53333
	0.216667	0.166667		1.13333	2.83333		2.41667	3.1		2.41667	3.1
	0.366667	1.55		1.41667	4.15		1.68333	7.76667		1.68333	ND
	0.366667	0.55		2.46667	0.8		3.26667	4.23333		5.48333	5.38333
	0.783333	0.233333		1.2	4.93333		4.06667	0.883333		1.06667	1.8
	0.5	0.483333		1.01667	0.583333		1.06667	1.55		2.53333	1.55
	0.2	0.3		1.5	1.63333		1.81667	5		5.61667	6.1
	0.95	0.116667		1	3.8		5.61667	0.35		5.6	0.35
	0.683333	0.233333		1.46667	2.88333		2.16667	0.65		3.16667	0.65
	0.566667	0.283333		1.46667	2.18333		3.16667	9.25		2.9	ND
	1.61667	0.316667		2.75	3.68333		2.78333	3.01667		1.06667	4
	0.933333	0.333333		1.03333	1.7		1.06667	3.68333		0.983333	3.68333
	0.683333	0.683333		1.1	0.3		0.983333	2.23333		1.68333	3.01667
	0.216667	0.233333		0.4	1.58333		1.35	3.73333		2.05	3.73333
	0.3	0.15		1.25	0.8		1.01667	1.88333		0.25	2.16667
	0.133333	0.2		1.85			0.25	0.583333		4.23333	1.11667
	0.233333	0.683333		0.866667			0.65	1.61667		5.63333	1.61667
	0.25	0.366667					0.966667	0.966667		1.13333	1.26667
	0.383333						1.13333			ND
	Figure 5S4B, following			Figure 5S4B, courtship display			Figure 5S4B, wrapping			Figure 5S4B, spawning
	+/+ male	-/- male		+/+ male	-/- male		+/+ male	-/- male		+/+ male	-/- male
	0.433333	0.166667		2.01667	0.483333		1.35	0.65		2.25	1.61667
	0.95	0.15		1.3	1.33333		1.41667	1.41667		3.58333	1.6
	0.116667	0.233333		3.56667	0.833333		3.6	5.25		4.43333	8.38333
	1.08333	0.55		3.61667	1.81667		4.2	1.35		4.2	2.5
	0.55	0.7		0.683333	5.11667		0.583333	6.31667		1.53333	ND
	0.316667	0.183333		0.383333	0.783333		0.6	0.516667		0.6	0.85
	0.366667	0.35		1.26667	0.566667		1.86667	0.8		2.26667	0.8
	1.33333	0.183333		2.56667	0.9		2.73333	1.33333		7.46667	1.33333
	0.316667	0.516667		1.7	1.31667		1.73333	2.75		11.7833	2.75
	0.683333	0.583333		1.66667	10.75		5.7	11.4		8.75	13
	0.316667	0.983333		1.18333	1.31667		1.93333	1.53333		4.8	2.1
	0.366667	0.366667		0.733333	0.633333		1.45	0.7		1.45	0.7
	0.1	0.466667		0.316667	1.3		0.4	1.66667		3.51667	2
	0.483333	0.166667		1.53333	1.88333		2.5	2.41667		2.98333	2.78333
	0.266667	0.2		0.816667	1.46667		0.883333	2.21667		0.883333	2.21667
	0.466667	0.6		3.5	11.4333		2.73333	13.2667		2.73333	13.2667
	1.43333	0.666667		4.08333	3.6		4.2	4.01667		4.2	3.83333
	0.266667	0.95		1.23333	3.18333		6.61667	4.18333		6.61667	4.18333
	0.833333	0.233333		0.933333	0.933333		1.06667	0.966667		1.58333	2.11667
	0.8	0.366667		2.8	1.01667		3.2	5.95		3.2	5.95
	0.383333	0.466667		0.9	0.716667		4.38333	1.1		4.38333	1.1
	0.233333	0.383333		0.966667	1.66667		1.01667	2.71667		9.28333	2.71667
	1.16667	0.483333		2.58333	1.78333		3.65	7.7		3.65	8.43333
	Figure 5S4C, following			Figure 5S4C, courtship display			Figure 5S4C, wrapping			Figure 5S4D, courtship display			Figure 5S4D, wrapping attempt
	+/+ male	-/- male		+/+ male	-/- male		+/+ male	-/- male		+/+ male	-/- male		+/+ male	-/- male
	0.45	1.65		1.36667	5.48333		2.6	12.6167		18	15		1	3
	0.2	0.2		0.333333	0.916667		2.86667	2.61667		38	0		12	0
	2.41667	1.08333		7	3.98333		3.9	5.56667		31	42		21	15
	0.65	5.48333		1.33333	11.05		1.35	3.85		20	15		17	5
	0.333333	1.88333		1.38333	2.01667		2.16667	7.01667		56	2		18	0
	0.466667	0.5		0.95	4.81667		1.23333	ND		25	17		18	4
	0.233333	1.9		0.333333	11.4667		1.21667	0.65		38	19		33	3
	0.633333	0.433333		1.51667	0.533333		4.53333	10.4667		33	8		24	2
	0.35	1.48333		0.416667	3.63333		9.23333	3.21667		8	13		1	8
	0.316667	0.683333		2	1.53333		9.5	ND		37	14		5	4
	0.716667	1.66667		4.66667	13.9667		1.76667	0.733333		11	42		11	15
	1.08333	0.25		2.16667	0.916667		13.3667	2.01667		16	11		3	1
	0.3	0.683333		ND	1.21667		10.95	2.35		5	25		14	18
	1.01667	1.68333		1.33333	2.06667		1.36667	0.95		39	58		28	24
	0.316667	0.783333		0.35	0.866667		1.75	ND		34	40		12	21
	5.08333	0.616667		9.41667	0.9		8.16667	0.75		15	78		14	43
	0.516667	0.3		0.566667	0.4		1.66667	14.9		69	29		35	3
	0.45	1.96667		0.766667	2.6		4.3	ND		46	49		35	22
	0.283333	3		1.11667	ND		1.41667	4.61667		56	10		20	3
	0.416667	0.933333		0.616667	1.61667		2.88333	10.0333		21	7		20	1
	1.65	2.58333		1.7	2.91667		13.7833	2.4		9	30		4	25
	1.06667	1.48333		7.26667	2.23333		2.6	5.68333		27	15		22	9
	0.616667	1.28333		1.31667	2.31667		8.71667	ND		32	32		5	7
	3.98333	ND		6.05	ND		ND	ND		5	35		1	34
	Figure 5S4E, chase			Figure 5S4E, fin display			Figure 5S4E, circle			Figure 5S4E, strike			Figure 5S4E, bite
	+/+ male	-/- male		+/+ male	-/- male		+/+ male	-/- male		+/+ male	-/- male		+/+ male	-/- male
	46	20		5	3		9	8		8	1		53	12
	5	32		5	0		3	6		1	4		7	24
	53	34		5	3		17	7		1	3		58	36
	0	60		0	2		1	5		1	2		2	29
	34	42		9	1		14	4		5	1		37	28
	81	8		6	3		17	8		5	9		54	11
	43	38		5	4		11	4		2	1		31	49
	14			4			5			2			14
