# Supplementary material for: Brain-derived estrogens facilitate male-typical behaviors by potentiating androgen receptor signaling in medaka
Source: eLife. 2026 Jan 13;13:RP97106. doi: 10.7554/eLife.97106 (PMC12799210; doi:10.7554/eLife.97106)
Supplement: Figure 5—source data 1. [file elife-97106-fig5-data1.xlsx]

## Sheet: Sheet1
	Figure 5A, left
		+/+ male					-/- male
	Vv	0.149	0.460655	0.438971	0.090309	0.212481	0.051743	0.114984	0.113306	0.264341	0.283266
	Vs/Vp	0.592288	1.47263	1.08946	0.721637	0.935322	0.673731	0.563541	1.02239	1.20397	0.605219
	PPa	2.16709	2.87963	5.24729	3.40085	2.76345	2.86848	4.35203	3.66987	2.72474	2.27391
	aPPp	0.49563	1.01138	0.710019	0.488796	1.16289	0.609292	0.261589	0.456698	0.363993	0.32351
	pPPp	0.053779	0.130076	0.270808	0.02132	0.041203	0.269253	0.18625	0.075577	0.059528	0.170918
	NVT	2.42509	2.64403	2.50064	1.56496	1.83926	3.01843	1.98611	2.47836	2.70665	2.73157
	Figure 5A, right
		+/+ male					-/- male
	PMp	16.4238	23.1173	14.851	13.7355	18.0145	6.27821	11.0771	13.7235	12.0824	7.79778
	NPT	8.5783	15.0185	13.0776	15.7192	12.6663	13.0851	9.77436	13.1567	10.9209	11.601
	Figure 5C, left
		+/+ male					-/- male
	Vs/Vp	0.10133	0.169241	0.297039	0.14265	0.296559	0.141813	0.155827	0.053659		0.057013
	PMm/PMg/aPPp	0.194156	0.147322	0.105521	0.168522	0.177384	0.082165	0.134148	0.11678	0.012337	0.139298
	pPPp	0.019883	0.004911	0.008384	0.022637	0.018086	0.003593	0.012816	0.004911	0.003473	0.001437
	VM	0.050785	0.000838	0.001557	0.00012	0.002276	0.001437	0	0.00012	0	0.00012
	NAT	0.32519	0.260628	0.166007	0.181337	0.210801	0.09558	0.128997	0.121571	0.121213	0.293928
	NPT		0.200981	0.015092	0.081207	0.051263	0.024434	0.043718	0.02647	0.011978	0.056654
	Figure 5C, right
		+/+ male					-/- male
	PMp	12.4926	14.0295	12.1467	13.9459	12.6327	13.1709	7.28997	11.9734		12.0569
	PPa	1.32052	1.41896	0.478736	0.504846	0.558503	0.520301	0.32998	0.354294	0.121811	0.149
	NVT	6.43421	5.03625	5.79035	5.85717	4.32118	2.27787	4.28039	4.74847	2.49156	4.2901
	Figure 5F, following			Figure 5F, courtship display			Figure 5F, wrapping			Figure 5G, courtship display			Figure 5G, wrapping attempt
	+/+ male	-/- male		+/+ male	-/- male		+/+ male	-/- male		+/+ male	-/- male		+/+ male	-/- male
	1.86667	0.516667		1.15	0.583333		ND	0.65		17	50		2	20
	0.3	0.383333		1.16667	0.516667		5.73333	1.28333		53	55		13	30
	0.833333	0.383333		4.03333	0.716667		1.25	0.766667		0	44		0	15
	0.266667	6.36667		2.76667	7.15		4.36667	7.65		67	29		30	6
	0.3	0.266667		0.783333	0.433333		7.1	1.23333		73	63		29	22
	0.266667	7.38333		0.5	7.46667		4.08333	ND		54	12		8	2
	1.16667	0.3		0.783333	2.01667		ND	3.28333		48	52		11	32
	1.16667	0.3		0.783333	2.7		0.933333	5.4		14	21		1	10
	0.233333	0.383333		2.76667	1.4		2.31667	1.41667		67	35		28	10
	0.233333	0.933333		2.75	0.966667		2.88333	5.5		90	33		14	7
	0.25	0.35		0.266667	1.7		2.48333	4.65		52	48		15	5
	0.266667	0.416667		0.9	0.983333		5.1	3.16667		63	51		31	15
	0.516667	0.466667		3.01667	1.08333		3.61667	1.4		49	33		13	11
	0.35	8.73333		1.48333	9.13333		8.73333	12.4667		72	9		18	1
	0.166667	0.366667		0.8	0.483333		0.516667	2.06667		42	45		4	10
	0.4	0.45		0.9	3		9.05	ND		61	26		29	14
	0.633333	0.166667		4.21667	3.25		1.96667	4.16667		0	70		0	30
	0.566667	0.55		3.71667	2.55		0.766667	5.03333		19	79		8	15
	0.3	2.45		0.55	ND		6.66667	13.9333		78	1		33	0
	0.366667	0.366667		ND	3.18333		4.3	2.58333		95	11		36	2
	0.233333	0.666667		ND	2.56667		4.86667	2.41667		65	12		16	4
	0.383333	0.616667			1.58333		0.533333	3.5		58	52		29	21
	0.6	0.25			1.81667		ND	8.46667		35	34		7	13
	0.25	1.86667			8.28333		ND	10.2667		55	18		19	13
		0.683333			4.53333			0.683333			26			9
		0.433333			ND			5.85			0			0
		0.533333			5.68333			4.36667			4			4
		0.183333			2.85			12.4167			23			18
		3.43333			12.4833			ND			35			5
		0.283333			ND			ND			15			4
		ND			ND			ND			14			2
	Figure 5I, following			Figure 5I, courtship display			Figure 5I, wrapping			Figure 5J, courtship display			Figure 5J, wrapping attempt
	+/+ male	-/- male		+/+ male	-/- male		+/+ male	-/- male		+/+ male	-/- male		+/+ male	-/- male
	0.483333	1.16667		4.4	3.8		6.06667	2.73333		20	39		17	14
	1.06667	0.366667		2.56667	4.1		3.41667	1.81667		46	33		24	24
	1.65	0.183333		4.03333	0.233333		2.5	0.333333		53	67		38	32
	0.4	0.45		3.08333	3.16667		4.75	1.36667		44	14		20	12
	1.05	0.65		6.38333	4.33333		6.33333	2.81667		18	41		21	7
	0.45	0.666667		1.03333	1.75		7.31667	3.86667		55	38		22	17
	0.566667	0.15		2.03333	0.316667		11.6833	2.78333		32	32		15	11
	0.233333	0.133333		0.35	0.3		1.25	2.93333		56	60		20	30
	0.233333	0.233333		0.633333	0.383333		14.8833	0.566667		10	68		4	27
	0.95	0.4		5.4	0.533333		10.25	0.583333		40	53		35	23
	0.316667	0.3		0.35	0.366667		1.7	1.76667		40	46		26	32
	0.5	0.466667		2.96667	0.516667		2.98333	1.03333		42	56		43	14
	0.283333	0.15		0.683333	0.45		0.983333	2.08333		24	59		14	32
	0.7	0.316667		1.73333	0.5		1.78333	ND		62	18		19	2
	0.5	0.433333		1.73333	1.16667		2.11667	10.3333		53	46		32	22
	1.08333	0.35		1.16667	3.9		2.46667	3.83333		26	17		21	14
	1.01667	0.216667		2.26667	5.56667		1.78333	0.95		54	44		35	25
	0.866667	0.133333		1.5	4.93333		0.9	7.66667		44	26		8	6
	0.05	0.0833333		0.283333	0.166667		1.1	0.5		16	39		4	18
	0.233333	0.183333		0.55	1.48333		1.58333	1.53333		53	18		22	6
	0.133333	0.266667		0.233333	1.36667		0.85	0.666667		14	56		8	34
	0.466667	0.15		1	0.15		1.93333	7		59	48		46	16
	0.2			0.883333			1.56667			31			18
	Figure 5K, chase			Figure 5K, fin display			Figure 5K, circle			Figure 5K, strike			Figure 5K, bite
	+/+ male	-/- male		+/+ male	-/- male		+/+ male	-/- male		+/+ male	-/- male		+/+ male	-/- male
	9	23		22	16		24	35		43	24		20	27
	10	16		8	14		28	17		11	15		11	18
	16	17		15	6		16	15		5	6		15	23
	9	28		8	12		69	9		54	5		29	19
	13	18		4	8		4	18		0	2		7	19
	23	8		1	3		10	24		1	14		20	18
	Figure 5L, chase			Figure 5L, fin display			Figure 5L, circle			Figure 5L, strike			Figure 5L, bite
	+/+ male	-/- male		+/+ male	-/- male		+/+ male	-/- male		+/+ male	-/- male		+/+ male	-/- male
	17	61		4	5		8	12		4	1		9	32
	85	58		5	2		10	2		3	2		42	35
	64	92		4	2		8	9		3	1		31	24
	31	70		6	2		8	3		2	0		19	17
	36	91		6	2		24	6		14	2		18	39
	73	111		13	2		26	9		13	4		22	25
	139	60		2	2		14	8		3	1		33	38
	42			3			12			3			16
